# Supplementary material for: Circulating Tumor DNA Monitoring Reveals Molecular Progression before Radiologic Progression in a Real-life Cohort of Patients with Advanced Non–small Cell Lung Cancer
Source: PubMed Central journal article supplement (PMC10035379; doi:10.1158/2767-9764.crc-22-0258), 2022-10-13
Supplement: crc-22-0258-s07.pdf [file crc-22-0258-s07.pdf]

Figure S7

# Chemotherapy-treated patients

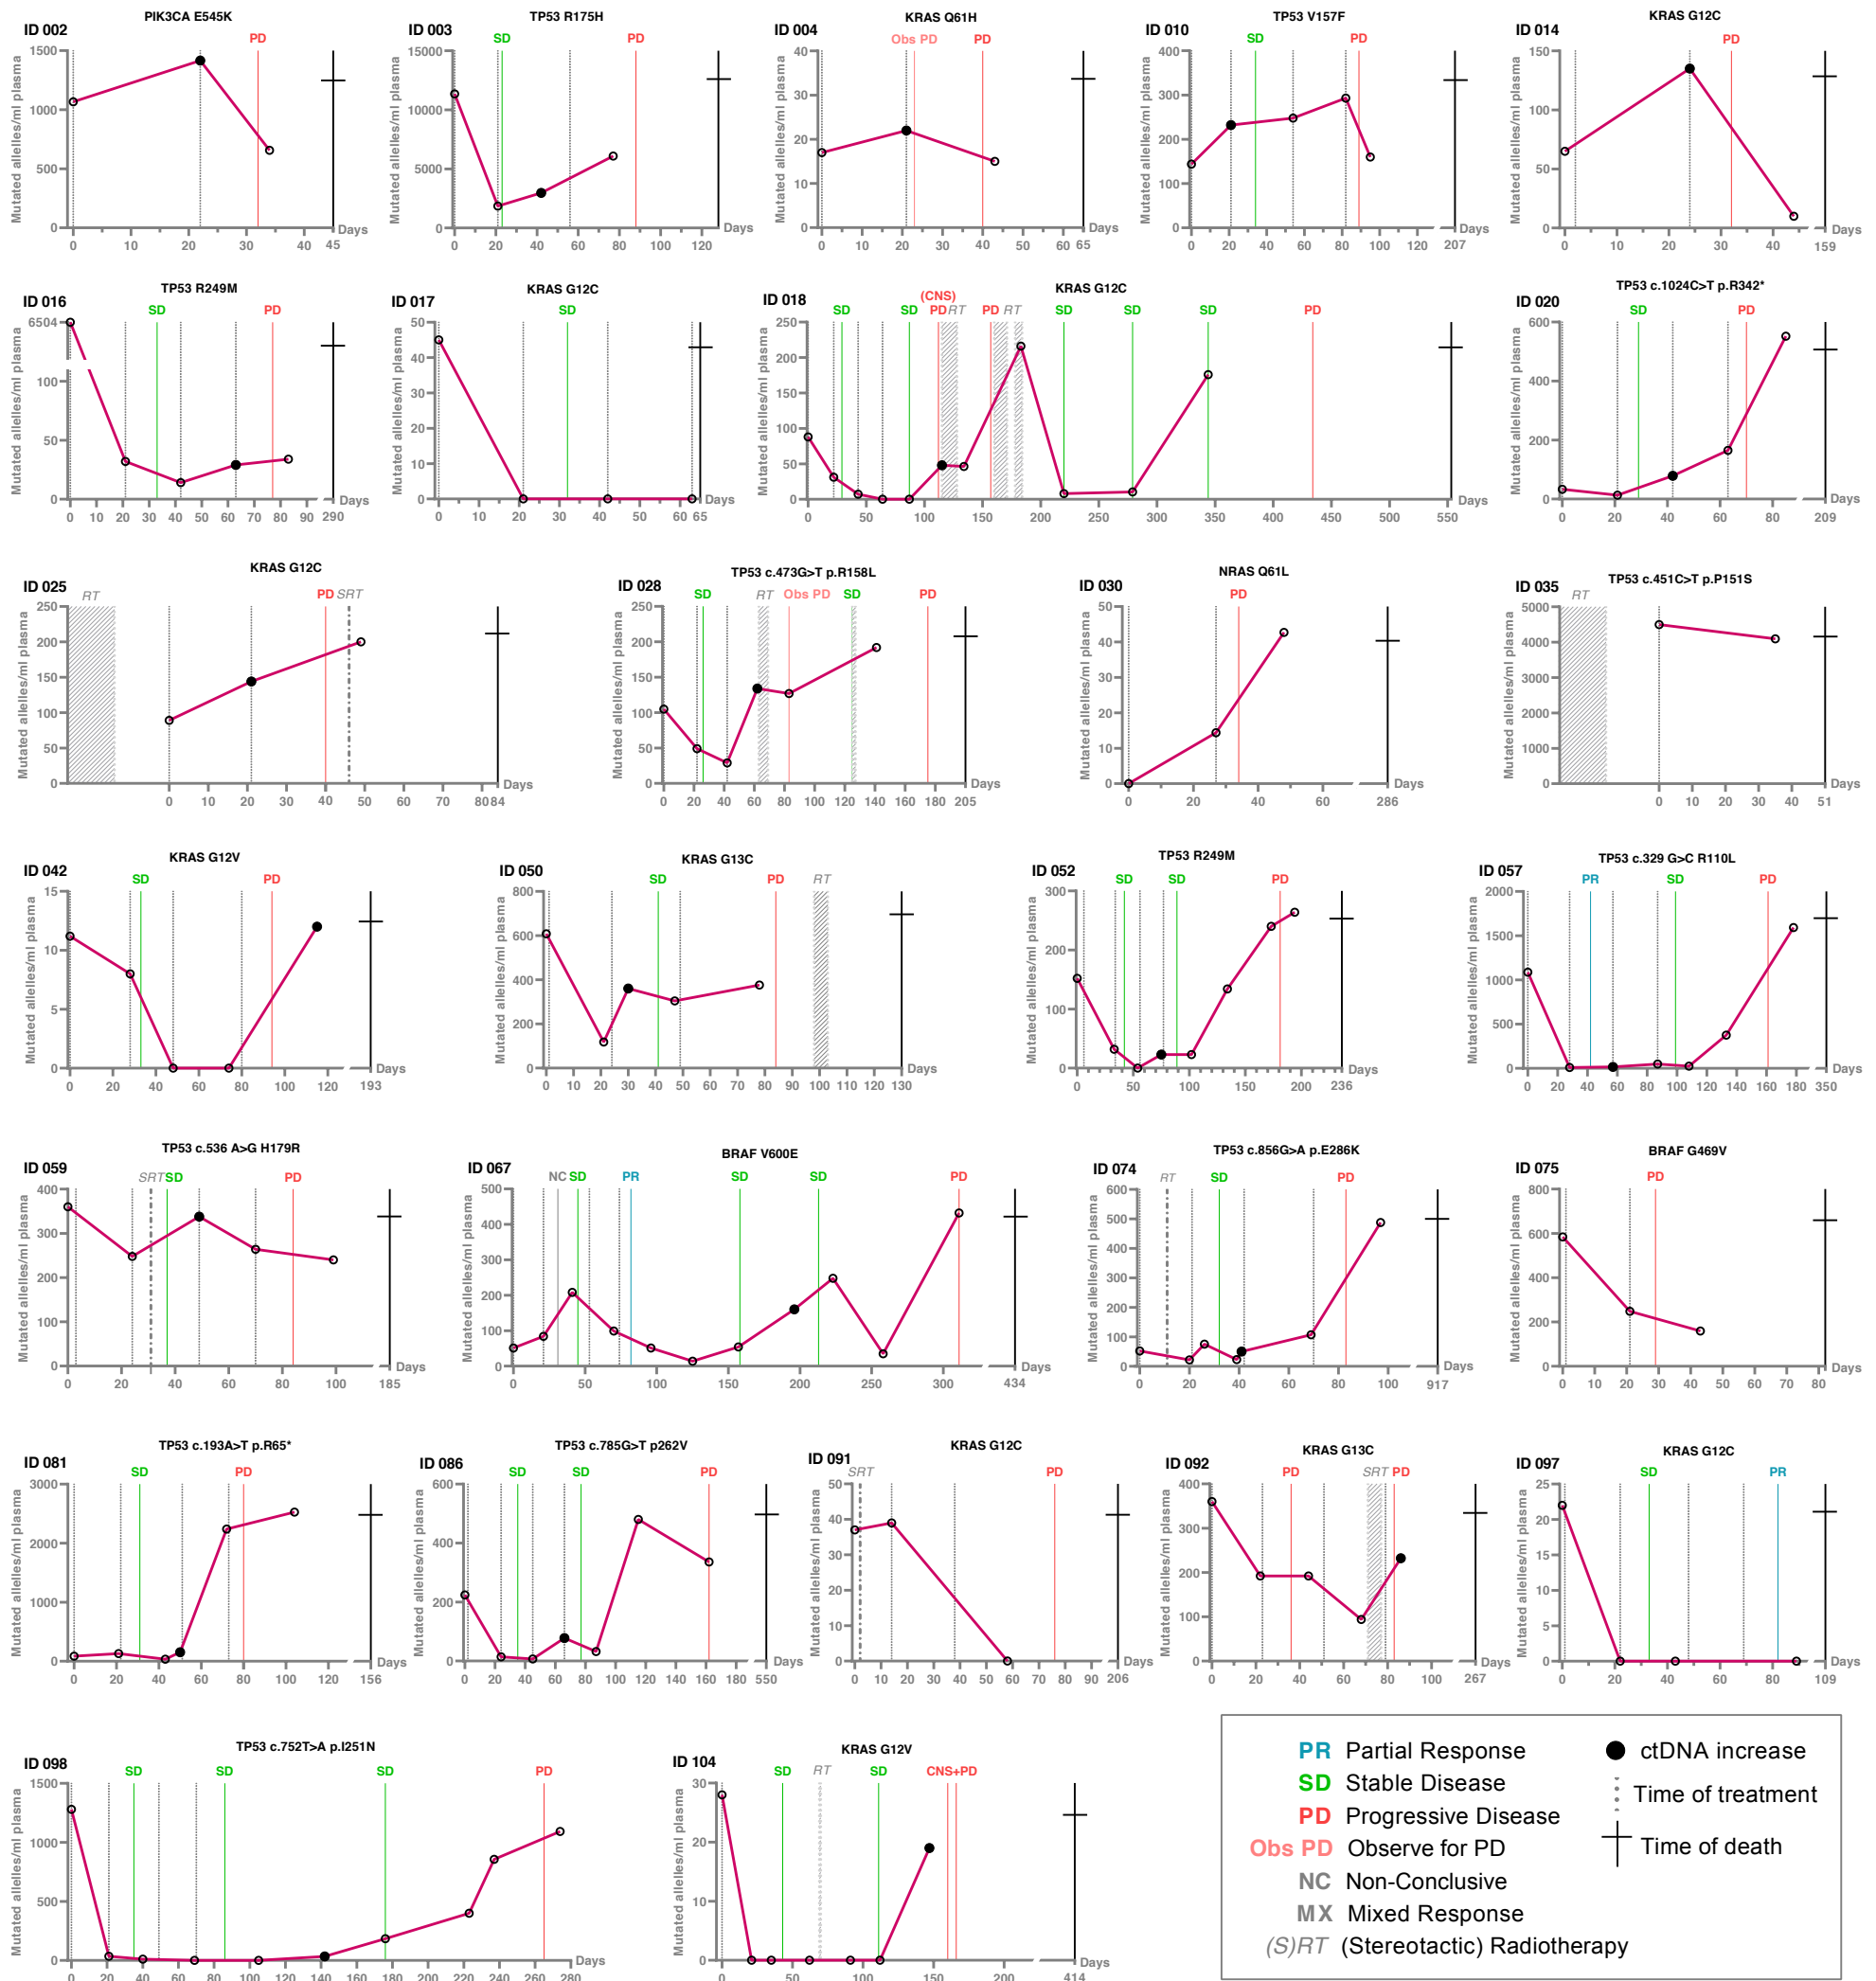

# Chemotherapy-treated patients

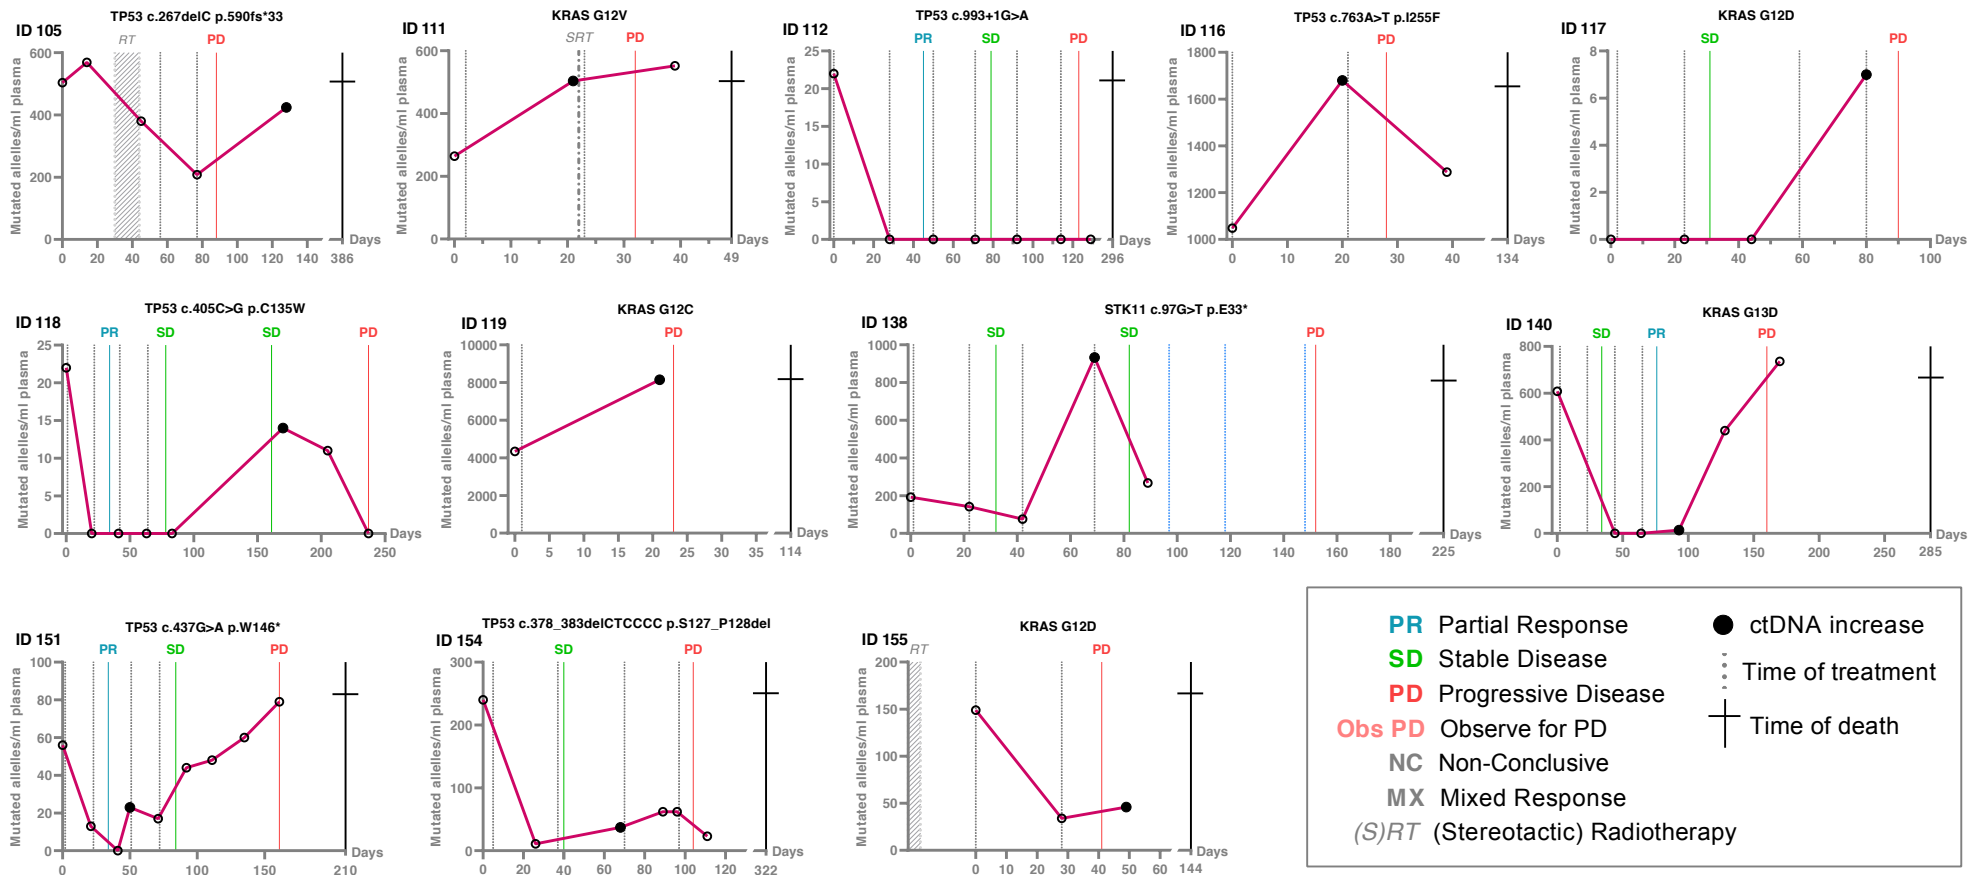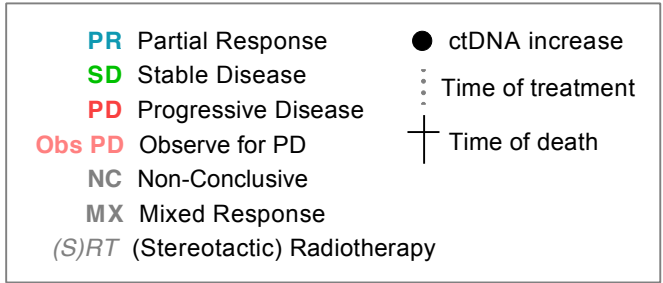

# Immunotherapy-treated patients

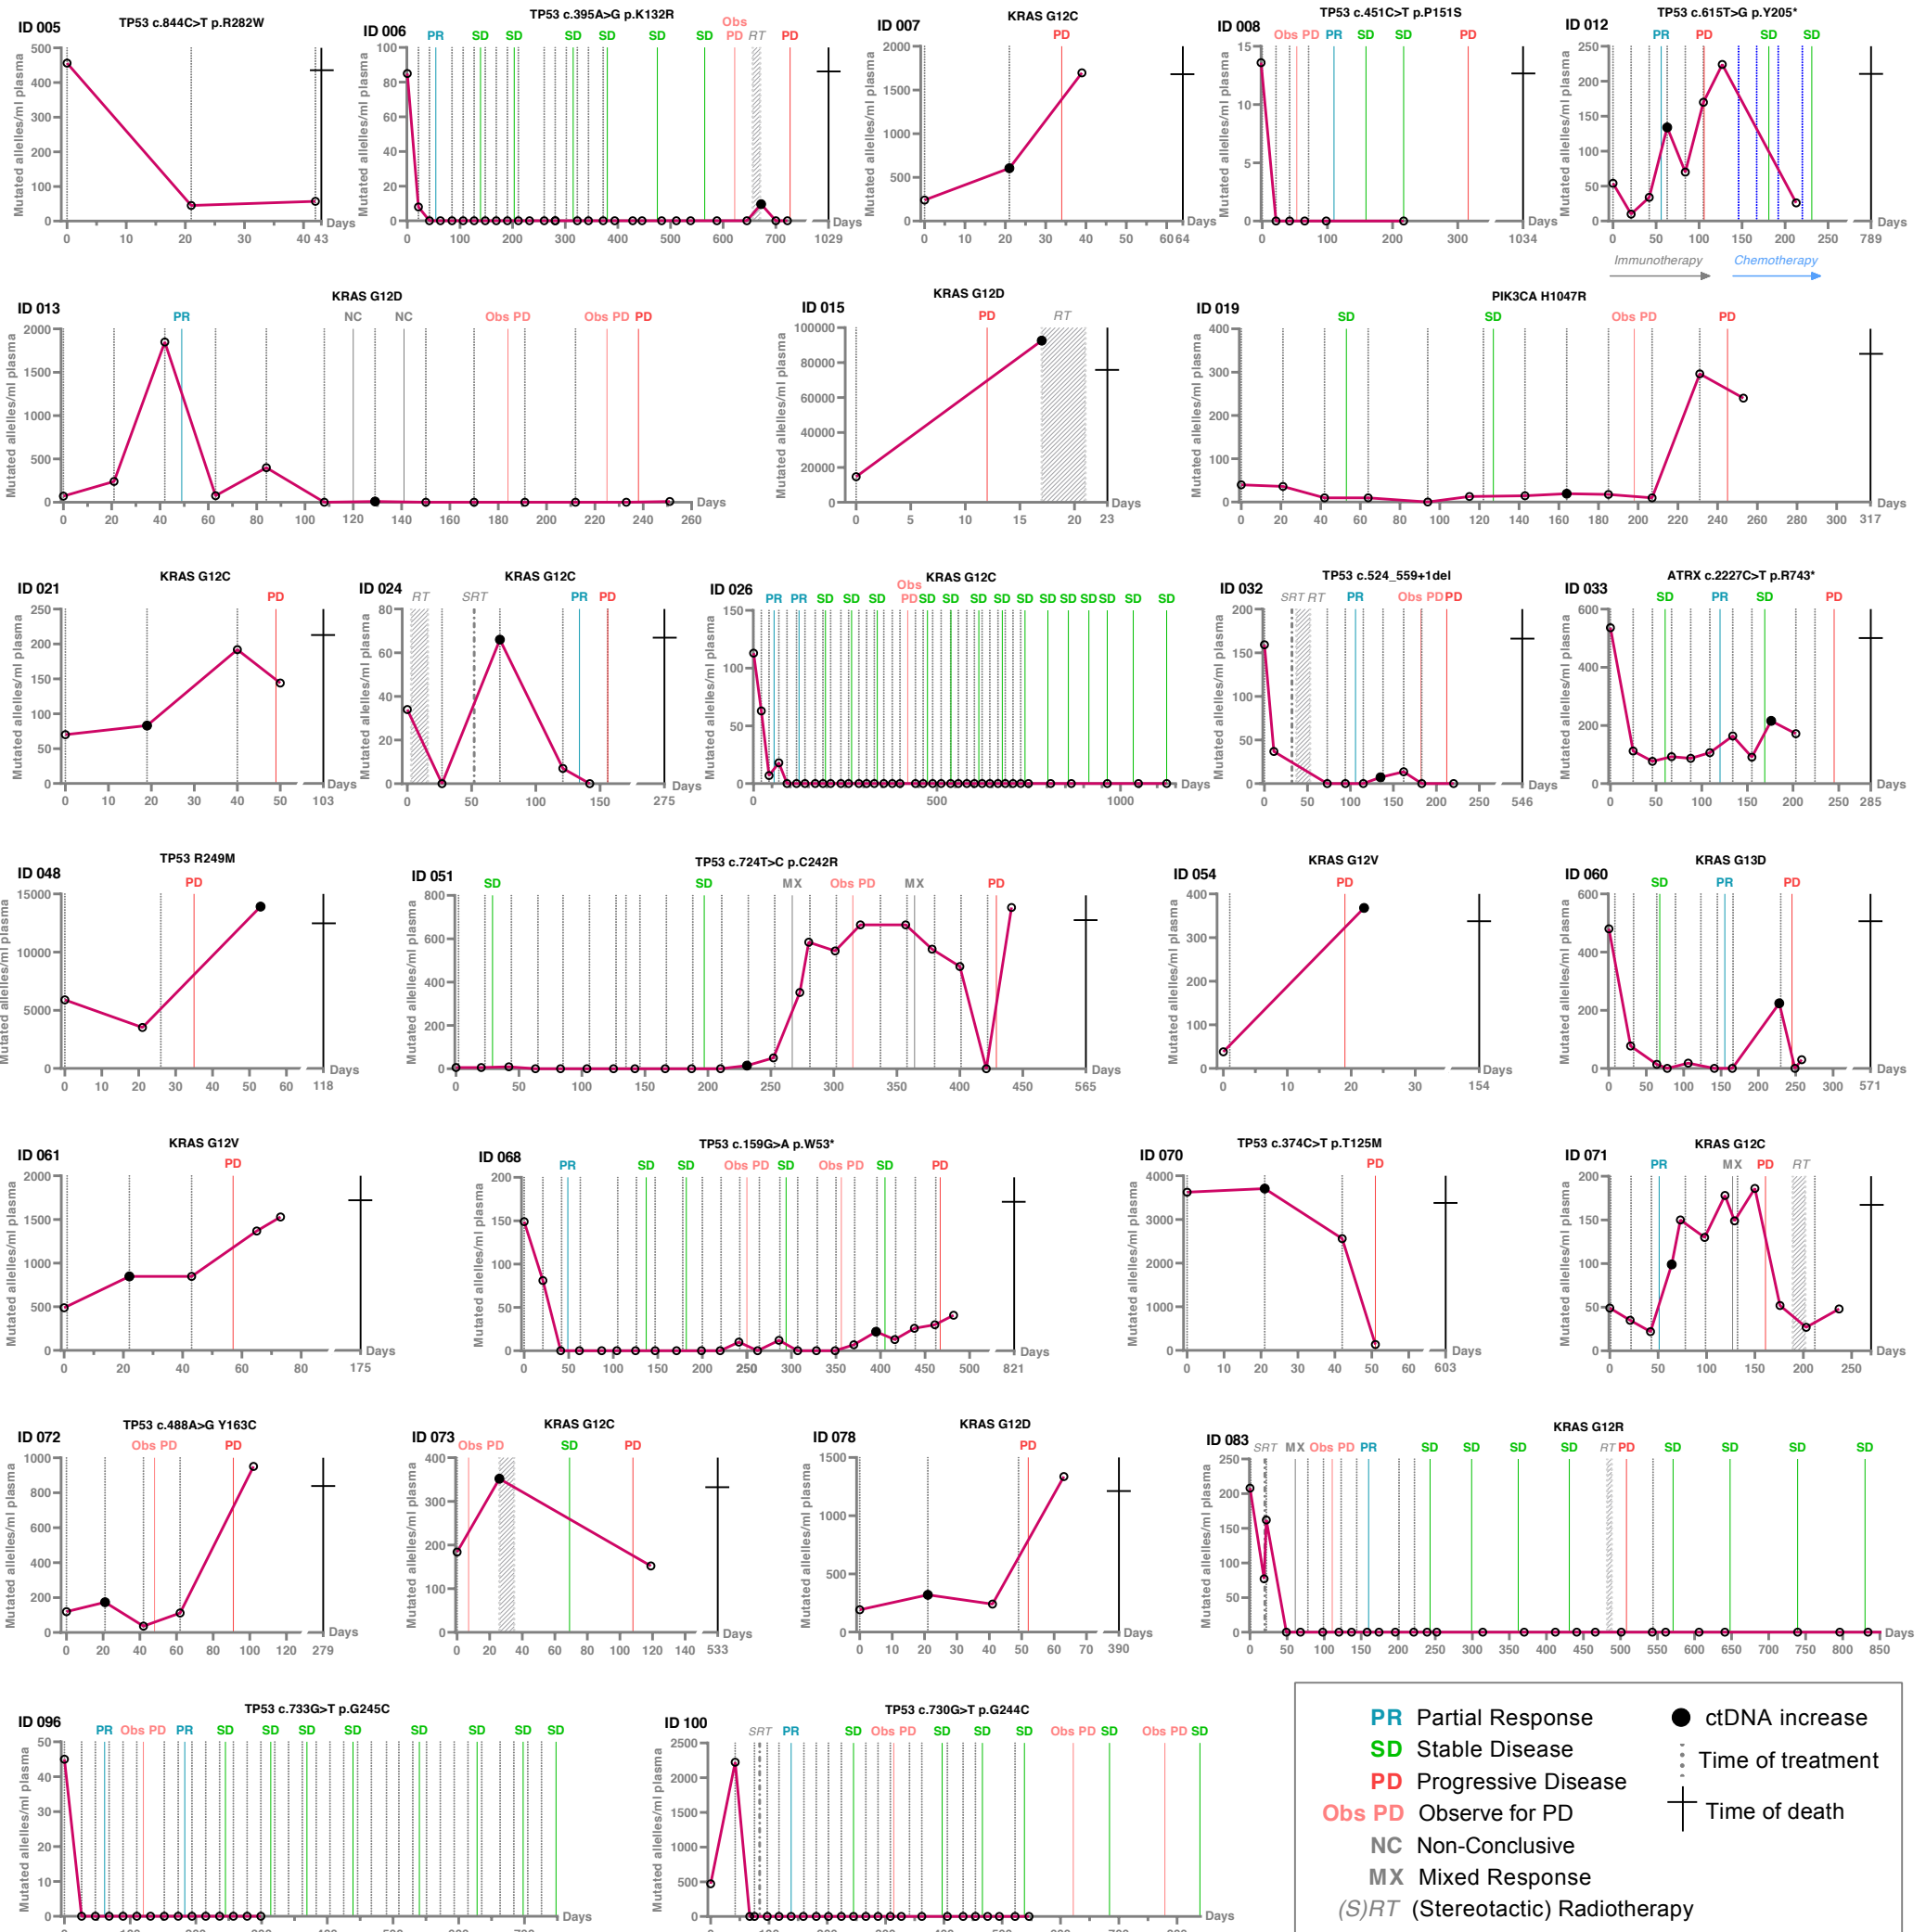

# Immunotherapy-treated patients

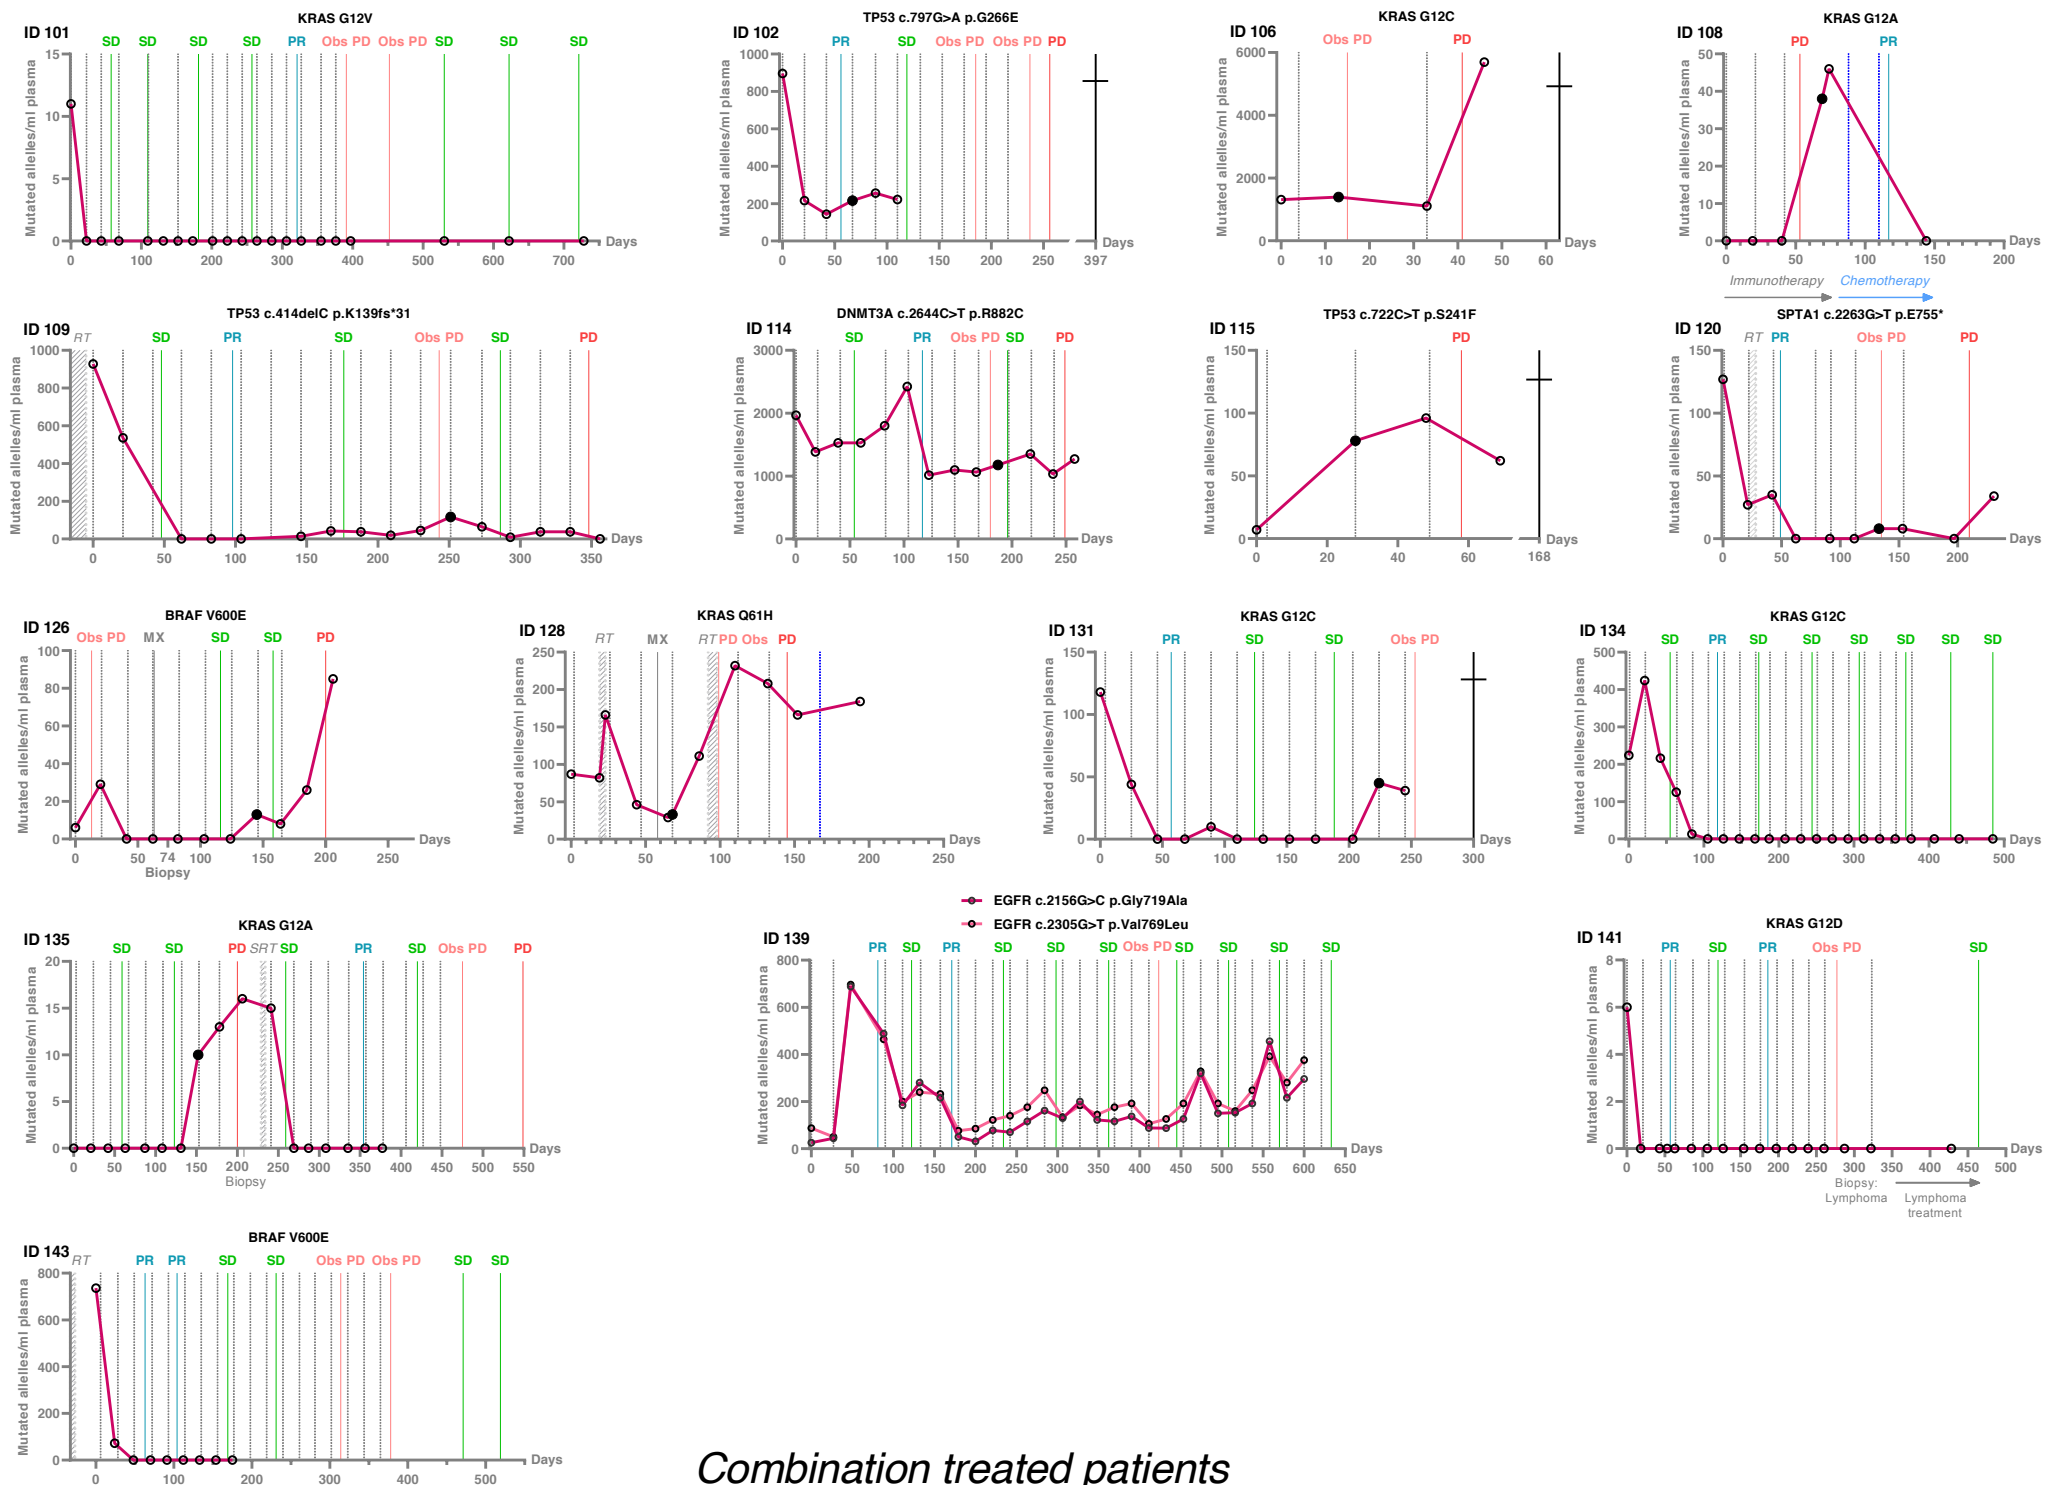

# Combination treated patients

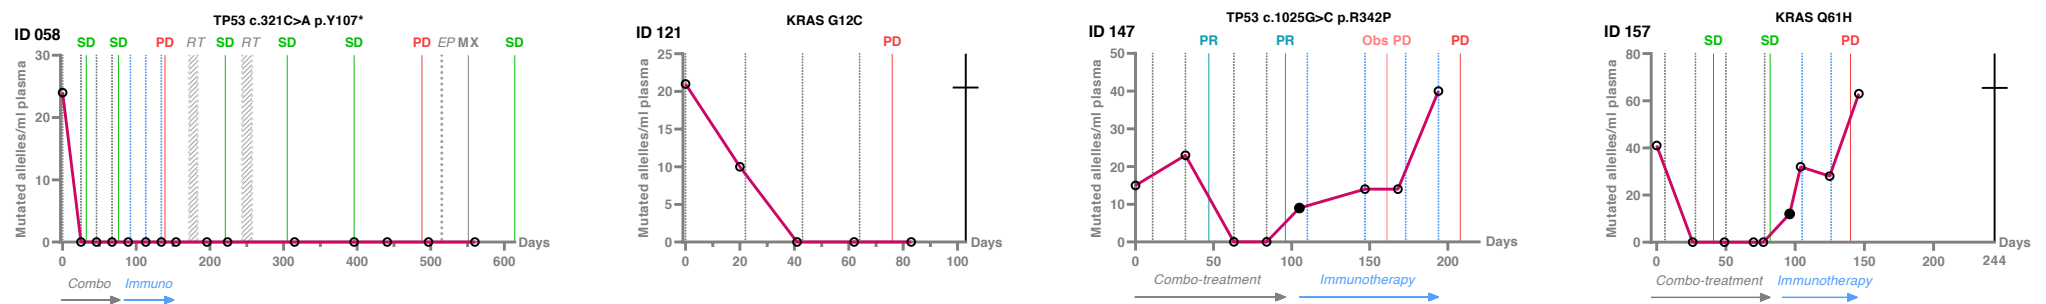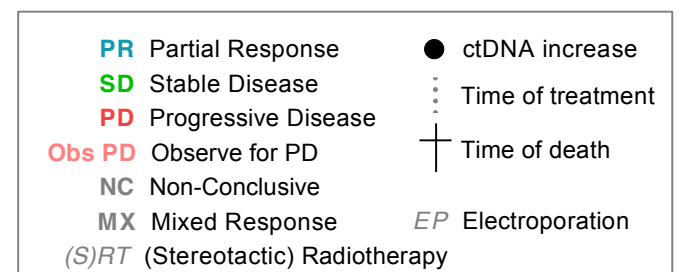

Figure S7. All patient cases
