# Supplementary material for: Circulating Tumor DNA Monitoring Reveals Molecular Progression before Radiologic Progression in a Real-life Cohort of Patients with Advanced Non–small Cell Lung Cancer
Source: PubMed Central journal article supplement (PMC10035379; doi:10.1158/2767-9764.crc-22-0258), 2022-10-13
Supplement: crc-22-0258-s11.pdf [file crc-22-0258-s11.pdf]

Table S4

|                             | <b>Non-<br/>detectable<br/>ctDNA<br/>(n=44)</b> | <b>Detectable<br/>ctDNA<br/>(n=88)</b> | Fisher's<br>Exact test | Logistic<br>regression<br>(sign.) | Odds<br>ratio | 95% CI<br>interval |
|-----------------------------|-------------------------------------------------|----------------------------------------|------------------------|-----------------------------------|---------------|--------------------|
| <b>Variables</b>            | <i>n (%)</i>                                    | <i>n (%)</i>                           | <i>p</i>               |                                   |               |                    |
| Adenocarcinoma              | 38 (86%)                                        | 57 (65%)                               | 0.013                  | 0.008                             | 3.868         | 1.421-             |
| Non-adenocarc.              | 6 (14%)                                         | 31 (35%)                               |                        |                                   |               | 10.525             |
| Stage III                   | 11 (25%)                                        | 12 (14%)                               | 0.143                  | 0.603                             | 1.301         | 0.483-             |
| Stage IV                    | 33 (75%)                                        | 76 (86%)                               |                        |                                   |               | 3.509              |
| Liver metastases            | 3 (7%)                                          | 19 (22%)                               | 0.046                  | 0.055                             | 3.698         | 0.973-             |
|                             |                                                 |                                        |                        |                                   |               | 14.058             |
| Adrenal gland<br>metastases | 9 (20%)                                         | 32 (36%)                               | 0.074                  | 0.048                             | 2.515         | 1.007-             |
|                             |                                                 |                                        |                        |                                   |               | 6.284              |
| Pleura fluid                | 15 (34%)                                        | 32 (36%)                               | 0.849                  | -                                 | -             | -                  |
| Bone                        | 8 (18%)                                         | 24 (27%)                               | 0.288                  | -                                 | -             | -                  |
| Brain                       | 5 (11%)                                         | 5 (6%)                                 | 0.300                  | -                                 | -             | -                  |
| Retroperitoneal<br>glands   | 2 (5%)                                          | 10 (11%)                               | 0.336                  | -                                 | -             | -                  |
| Standard assay              | 20 (45%)                                        | 37 (42%)                               | 0.198                  | -                                 | -             | -                  |
| Designed assay              | 24 (55%)                                        | 51 (58%)                               |                        |                                   |               |                    |

Table S4. Analyses of variables for ctDNA detection
